# Supplementary material for: Tropisetron Protects Against Acetaminophen-Induced Liver Injury via Suppressing Hepatic Oxidative Stress and Modulating the Activation of JNK/ERK MAPK Pathways
Source: Hindawi journal article supplement (doi:10.1155/2016/1952947), 2016-01-01
Supplement: f1 [file 1952947.f1.pdf]

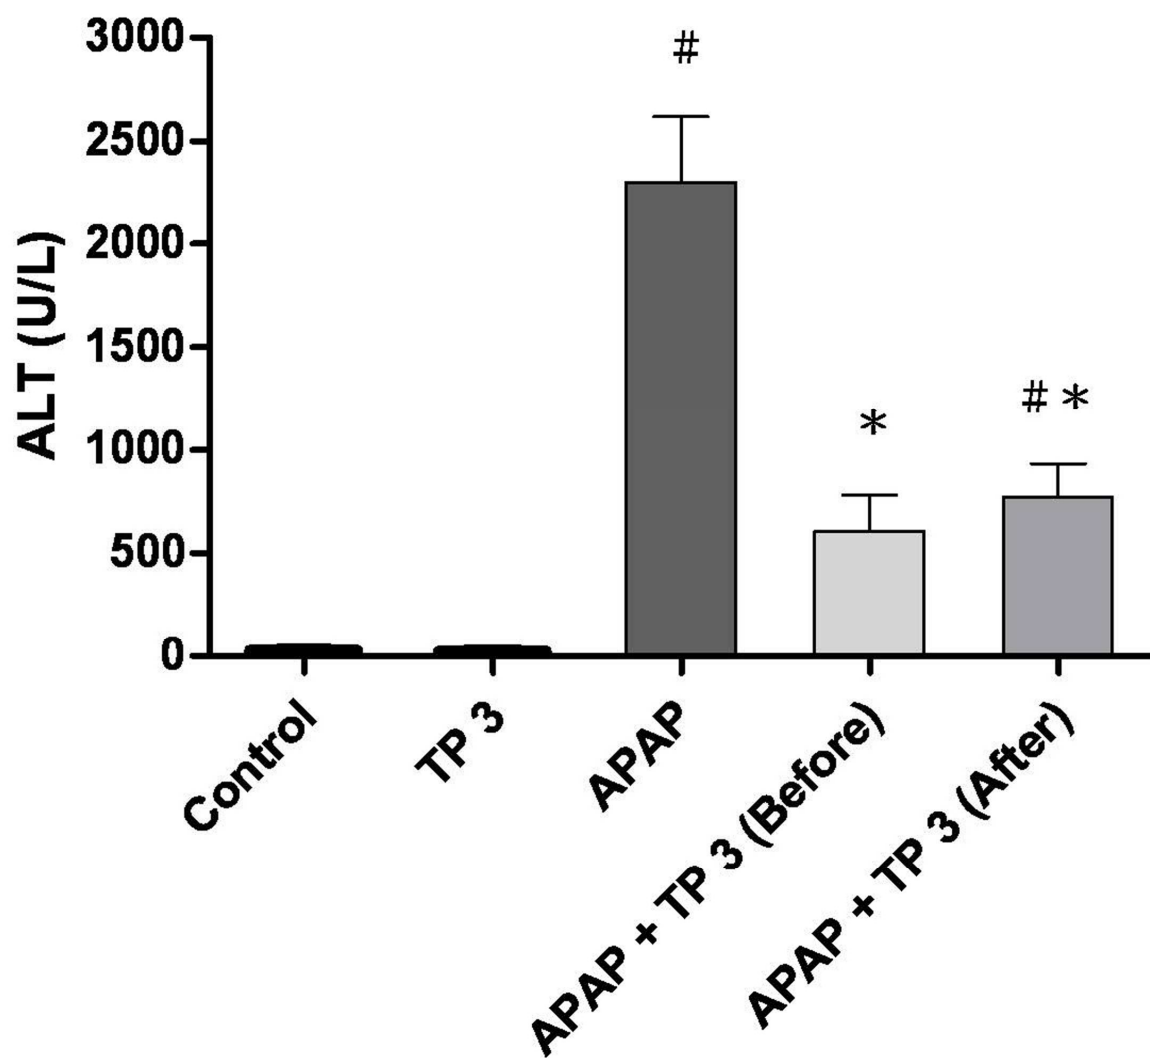

Fig. S1
